# Supplementary material for: Cognitive Decline Related to Diet Pattern and Nutritional Adequacy in Alzheimer’s Disease Using Surface-Based Morphometry
Source: MDPI journal article supplement (doi:10.3390/nu14245300), 2022-12-13
Supplement: s1 [file s1]

# Supplementary Data

**Table S1.** 22 food groups and food items included in this study.

| Food group     | Food items                                                                                            |
|----------------|-------------------------------------------------------------------------------------------------------|
| Fish           | Freshwater fish, marine fish, canned fish                                                             |
| Lean meat      | Lean pork, lean beef, lean lamb                                                                       |
| Fatty meat     | Pork knuckles, pork belly, semi-fatty beef                                                            |
| Poultry        | Chicken, duck, goose                                                                                  |
| Octopus        | Shrimp and crab, cuttlefish, octopus, squid, neritic squid                                            |
| Oyster         | Shellfish, snails, oyster                                                                             |
| Vegetable      | A variety colour of vegetables                                                                        |
| Fruit          | A variety colour of fruits or fresh juice                                                             |
| Egg            | Scrambled eggs, steamed eggs, salted eggs, peeled eggs                                                |
| Mushroom       | Shiitake mushrooms, straw mushrooms, enoki mushrooms, mushrooms                                       |
| Beans          | Red beans, mung beans, vegetable soybean, soybeans and products such as soy milk, bean blossoms, tofu |
| Soy products   | Dried tofu, vegetarian chicken, bean curd strips, fried bean curd                                     |
| Full-fat milk  | Full-fat milk, full-fat goat milk, yogurt                                                             |
| Low-fat milk   | Low-fat milk, Low-fat goat milk, yogurt                                                               |
| Skimmed milk   | Skimmed milk, skimmed -fat goat milk, yogurt                                                          |
| Fried food     | Vegetables, meats, legumes and all other foods that are fried in oil                                  |
| Processed food | Sausages, jerky, ham, bacon, pork floss                                                               |
| Entrails       | The liver, heart, kidneys, large intestine, and small intestine of animals                            |
| Sugar          | Candy, added sugar such as fructose, sugar, and honey                                                 |
| Sweet drink    | Sweetened beverage                                                                                    |
| Dessert        | Snack, dessert, Chinese pasty                                                                         |
| Coffee/tea     | Coffee, sugar-free green tea, black tea, and oolong tea                                               |

**Table S2.** Cortical thickness data of subjects.

| Cortical thickness exam 1(%)          | All (n=231) | Female (n=127) | Male (n=109) | p value |
|---------------------------------------|-------------|----------------|--------------|---------|
| Left-Hippocampus <sup>1</sup> (%)     | 0.218±0.041 | 0.221±0.043    | 0.216±0.038  | 0.631   |
| Right-Hippocampus <sup>1</sup> (%)    | 0.225±0.044 | 0.229±0.046    | 0.221±0.042  | 0.192   |
| Left-Amygdala <sup>1</sup> (%)        | 0.078±0.017 | 0.077±0.018    | 0.080±0.016  | 0.190   |
| Right-Amygdala <sup>1</sup> (%)       | 0.096±0.019 | 0.096±0.020    | 0.096±0.018  | 0.818   |
| Left-Accumbens-area <sup>1</sup> (%)  | 0.016±0.007 | 0.016±0.007    | 0.017±0.007  | 0.431   |
| Right-Accumbens-area <sup>1</sup> (%) | 0.025±0.007 | 0.025±0.008    | 0.025±0.007  | 0.898   |
| Cortical thickness exam 2(%)          | All (n=159) | Female (n=80)  | Male (n=79)  | p value |
| Left-Hippocampus <sup>2</sup> (%)     | 0.219±0.038 | 0.221±0.042    | 0.217±0.034  | 0.467   |
| Right-Hippocampus <sup>2</sup> (%)    | 0.225±0.041 | 0.231±0.043    | 0.219±0.038  | 0.072   |
| Left-Amygdala <sup>2</sup> (%)        | 0.079±0.015 | 0.078±0.017    | 0.081±0.014  | 0.328   |
| Right-Amygdala <sup>2</sup> (%)       | 0.096±0.017 | 0.096±0.018    | 0.095±0.016  | 0.907   |
| Left-Accumbens-area <sup>2</sup> (%)  | 0.018±0.007 | 0.018±0.008    | 0.018±0.007  | 0.603   |
| Right-Accumbens-area <sup>2</sup> (%) | 0.026±0.007 | 0.027±0.007    | 0.026±0.006  | 0.449   |

<sup>a</sup> Mean ± SD; 1.68E5 represents 1.68×10<sup>5</sup>; Mann-Whitney U test for the continuous variables of two groups.

\*. p value< .05; \*\*. p value< .01; \*\*\*. p value< .001.

Abbreviations: eTIV, estimated total intracranial volume. Measurements with superscript 1 indicate time point correspond to dietary pattern data collection, 2 indicates available historical data with the closest time point with time point 1.

**Table S3.** Cortical thickness data of the patients by three classified BMI.

| Cortical thickness exam1(%)           | Underweight <sup>a</sup> | Normal <sup>b</sup> | Overweight <sup>c</sup> | Obese <sup>d</sup> | p value | post hoc  |
|---------------------------------------|--------------------------|---------------------|-------------------------|--------------------|---------|-----------|
| Left-Hippocampus <sup>1</sup> (%)     | 0.199±0.032              | 0.215±0.037         | 0.217±0.046             | 0.226±0.042        | 0.047   |           |
| Right-Hippocampus <sup>1</sup> (%)    | 0.206±0.033              | 0.220±0.041         | 0.224±0.049             | 0.234±0.045        | 0.086   |           |
| Left-Amygdala <sup>1</sup> (%)        | 0.068±0.015              | 0.075±0.015         | 0.079±0.020             | 0.082±0.016        | .004**  | a<cd; b<d |
| Right-Amygdala <sup>1</sup> (%)       | 0.088±0.016              | 0.093±0.020         | 0.096±0.018             | 0.100±0.018        | 0.068   |           |
| Left-Accumbens-area <sup>1</sup> (%)  | 0.012±0.005              | 0.015±0.007         | 0.017±0.007             | 0.018±0.007        | .009**  | a<cd; b<d |
| Right-Accumbens-area <sup>1</sup> (%) | 0.021±0.007              | 0.025±0.008         | 0.027±0.007             | 0.026±0.006        | .0496*  | a<cd      |
| Cortical thickness exam 2(%)          | Underweight <sup>a</sup> | Normal <sup>b</sup> | Overweight <sup>c</sup> | Obese <sup>d</sup> | p value | post hoc  |
| Left-Hippocampus <sup>2</sup> (%)     | 0.193±0.033              | 0.218±0.033         | 0.220±0.039             | 0.223±0.042        | 0.261   |           |
| Right-Hippocampus <sup>2</sup> (%)    | 0.214±0.030              | 0.222±0.039         | 0.224±0.042             | 0.230±0.043        | 0.622   |           |
| Left-Amygdala <sup>2</sup> (%)        | 0.064±0.016              | 0.079±0.014         | 0.081±0.016             | 0.081±0.015        | 0.068   |           |
| Right-Amygdala <sup>2</sup> (%)       | 0.091±0.012              | 0.093±0.018         | 0.097±0.015             | 0.098±0.017        | 0.479   |           |
| Left-Accumbens-area <sup>2</sup> (%)  | 0.013±0.007              | 0.017±0.007         | 0.018±0.007             | 0.019±0.008        | 0.098   |           |
| Right-Accumbens-area <sup>2</sup> (%) | 0.023±0.009              | 0.025±0.008         | 0.027±0.007             | 0.027±0.005        | 0.613   |           |

Mean ± SD; 1.68E5 represents 1.68×10<sup>5</sup>; Kruskal-Wallis test for the continuous variables of three groups, Mann-Whitney U test for pairwise comparison; \*: p value<.05; \*\*: p value<.01; \*\*\*: p value<.001.

Abbreviations: BMI, Body mass index; eTIV, estimated total intracranial volume.
